# Supplementary material for: Tumor microenvironment derived exosomes pleiotropically modulate cancer cell metabolism
Source: eLife journal article supplement (doi:10.7554/elife.10250), 2016-02-27

Figure 2- figure supplement 2

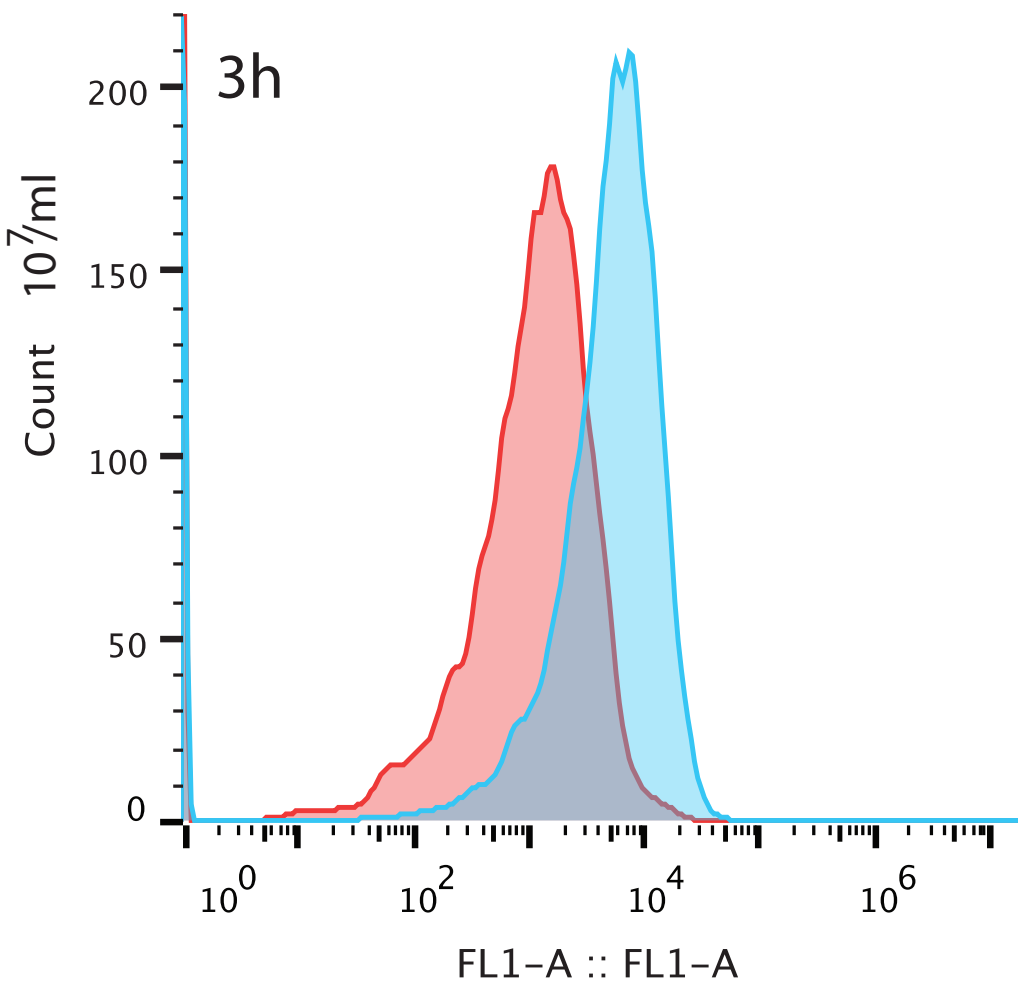

|  | Sample Name  | Subset Name | Count |
|--|--------------|-------------|-------|
|  | A02 LIP1.fcs | Cells       | 7104  |
|  | A01 CN-1.fcs | Cells       | 10706 |

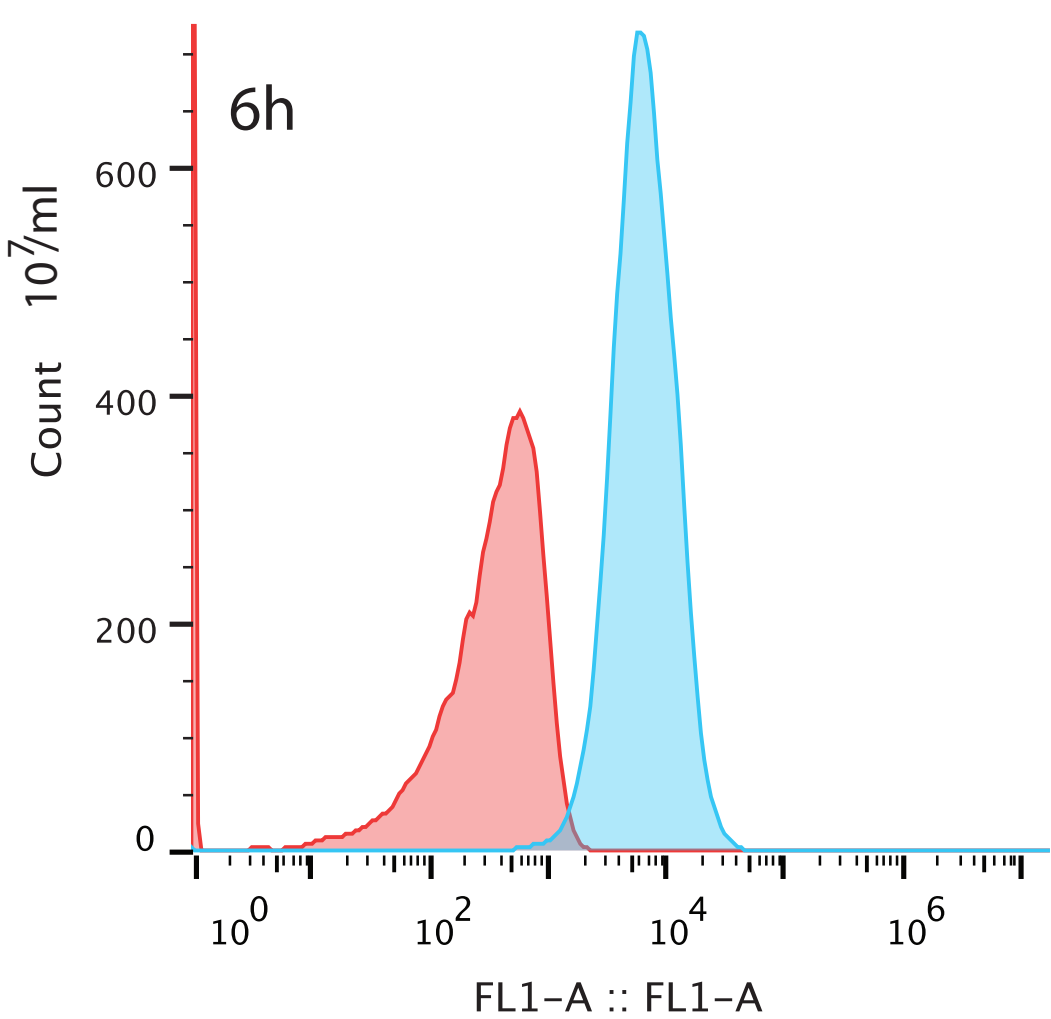

|  | Sample Name           | Subset Name | Count |
|--|-----------------------|-------------|-------|
|  | B03 lip-1 6 hours.fcs | Cells       | 16544 |
|  | A03 CN-1 6 hours.fcs  | Cells       | 16279 |

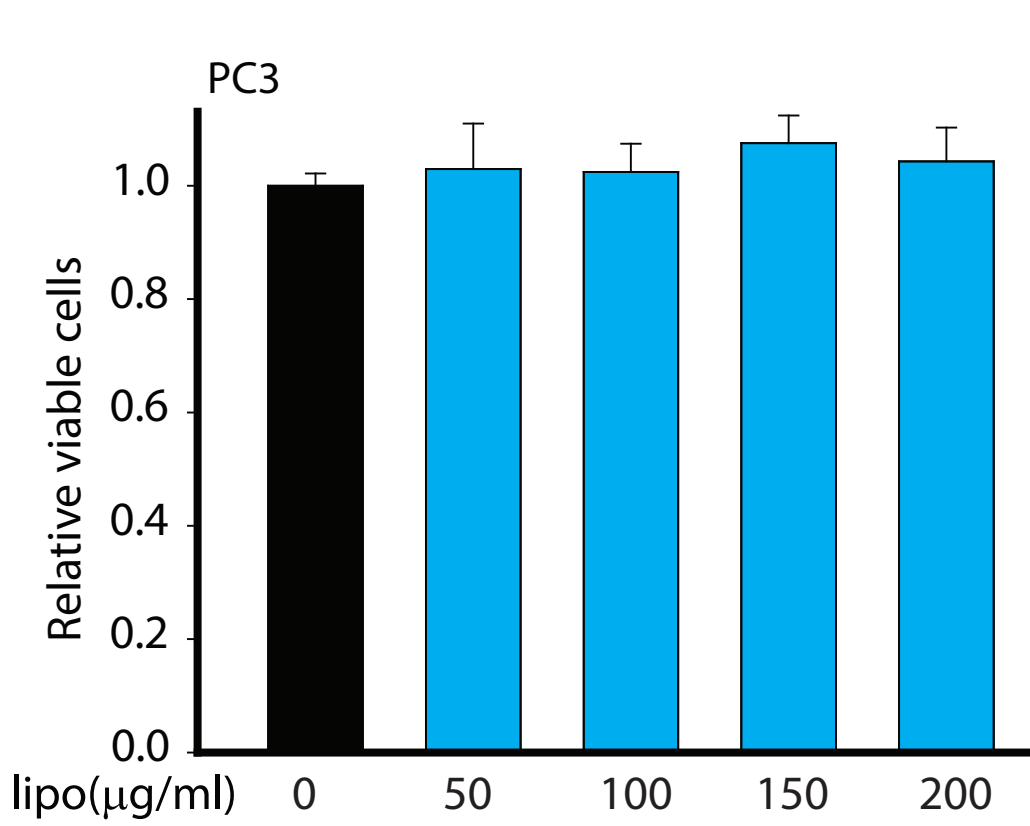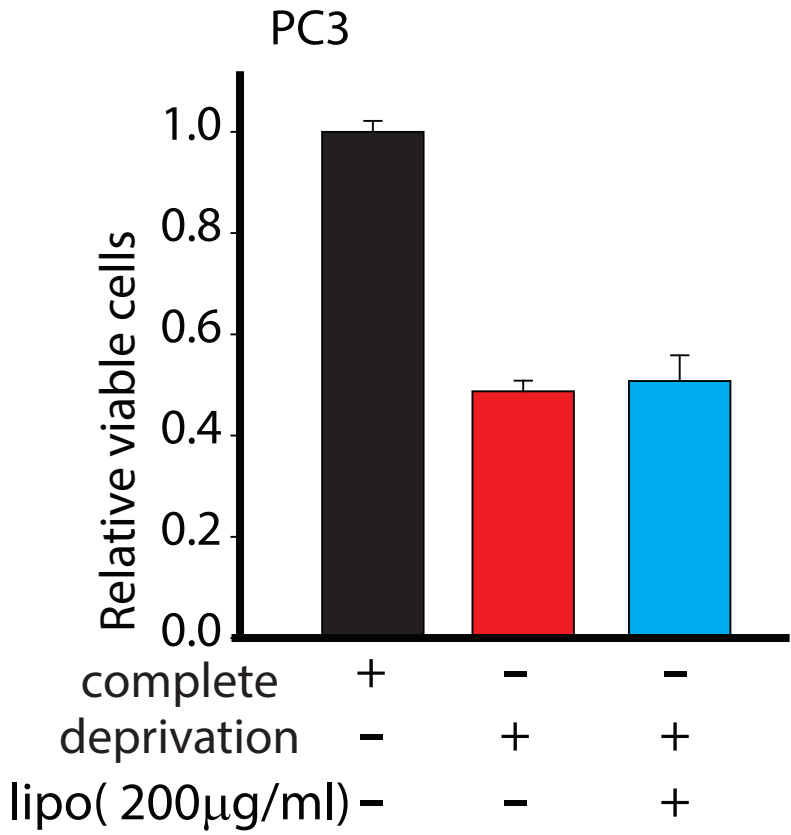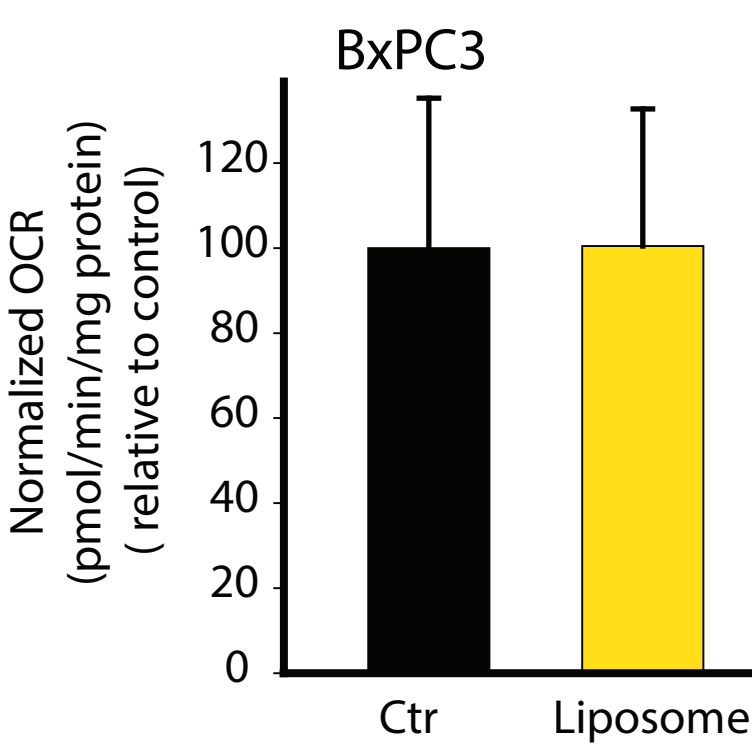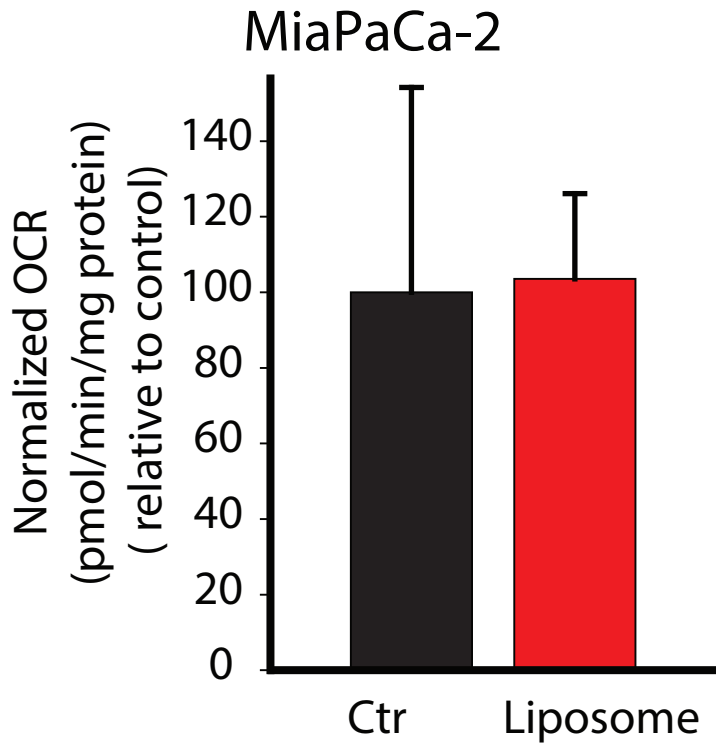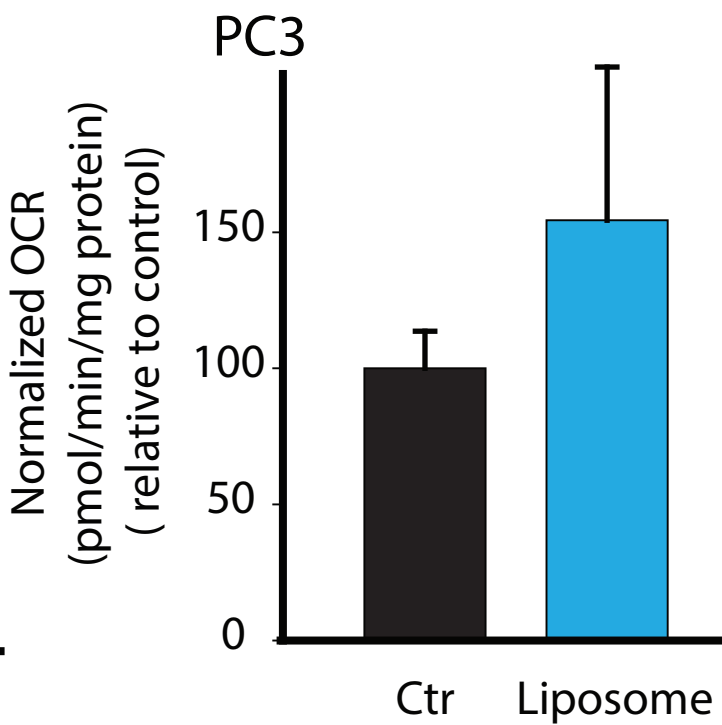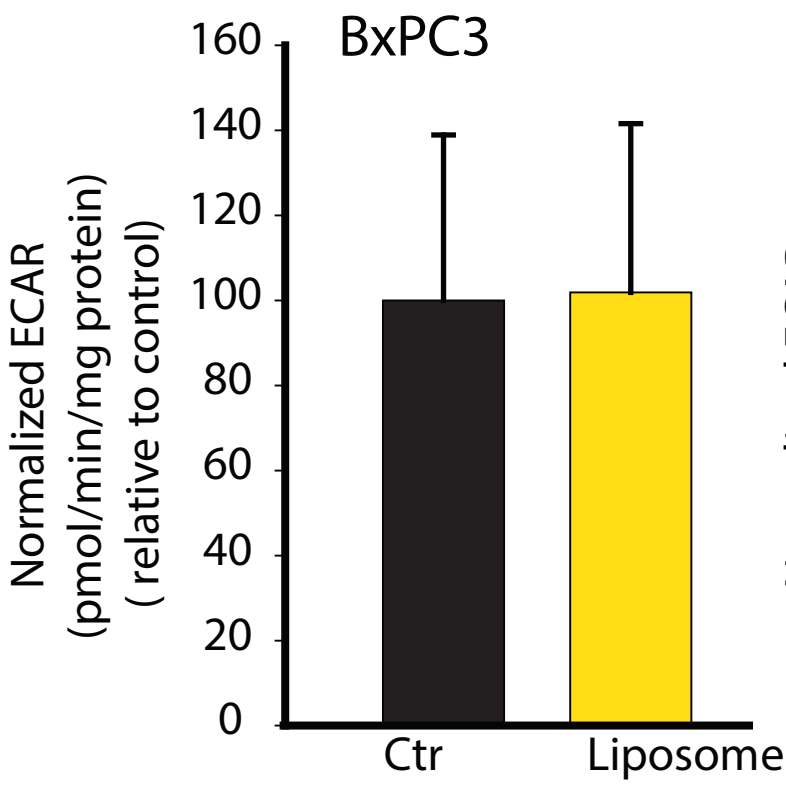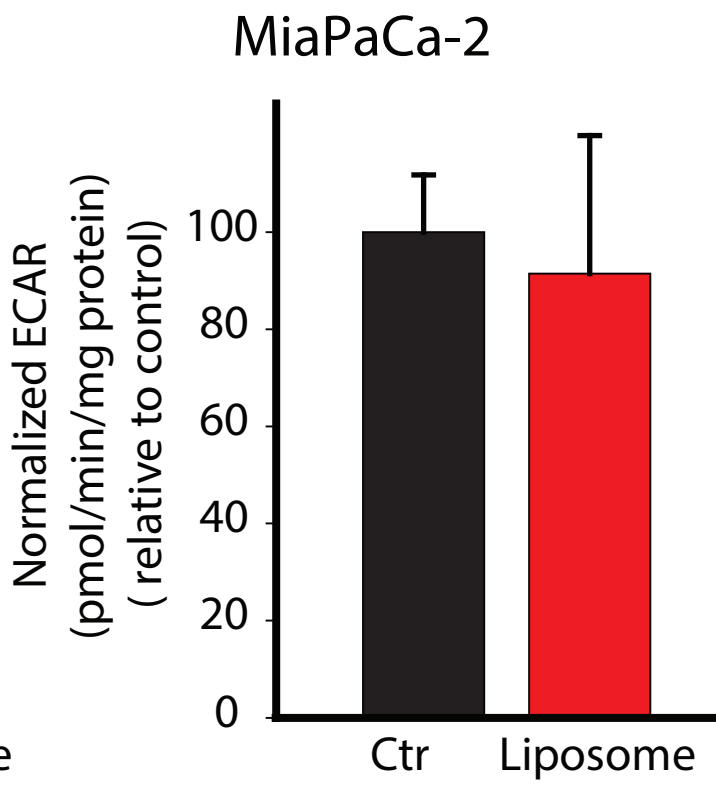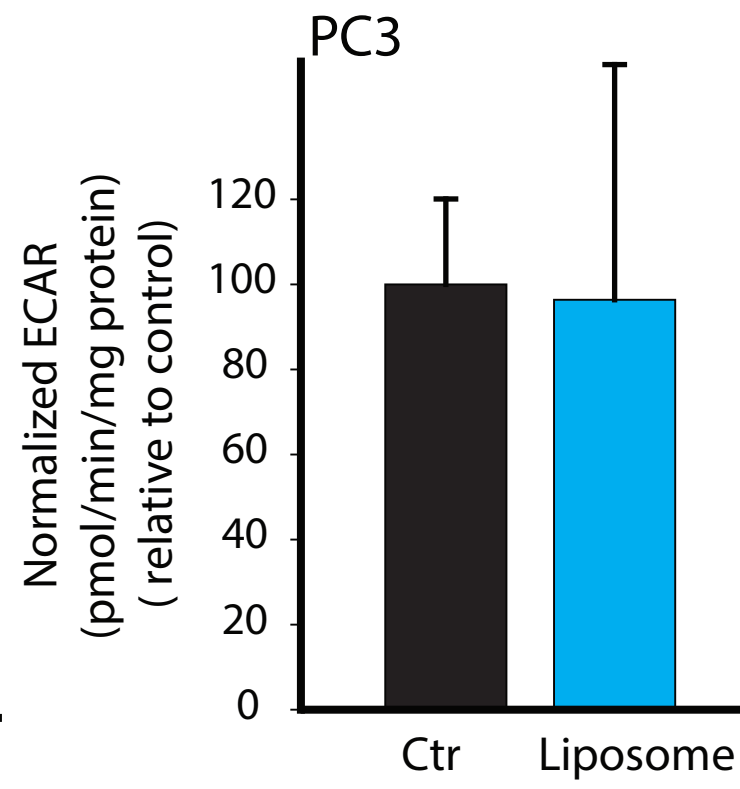

Supplement: supp [file elife-10250-supp-v1.zip]
