# Supplementary material for: Tumor microenvironment derived exosomes pleiotropically modulate cancer cell metabolism
Source: eLife journal article supplement (doi:10.7554/elife.10250), 2016-02-27
Supplement: supp [file elife-10250-supp-v1.zip]

Archive with 9 entries (9 files):
- elife_poa_e10250_Figure_7_figure_supplement_3.pdf
- elife_poa_e10250_Figure_2_figure_supplement_1.pdf
- elife_poa_e10250_Figure_7_figure_supplement_2.pdf
- elife_poa_e10250_Figure_7_figure_supplement_4.pdf
- elife_poa_e10250_Figure_2_figure_supplement_2.pdf
- elife_poa_e10250_Figure_7_figure_supplement_1.pdf
- elife_poa_e10250_Figure_4_figure_supplement_1.pdf
- elife_poa_e10250_Figure_3_figure_supplement_1.pdf
- elife_poa_e10250_Figure_6_figure_supplement_1.pdf
