# Supplementary figures and images for: Tumor microenvironment derived exosomes pleiotropically modulate cancer cell metabolism
Source: eLife journal article supplement (doi:10.7554/elife.10250), 2016-02-27

Figure 6- figure supplement 1.

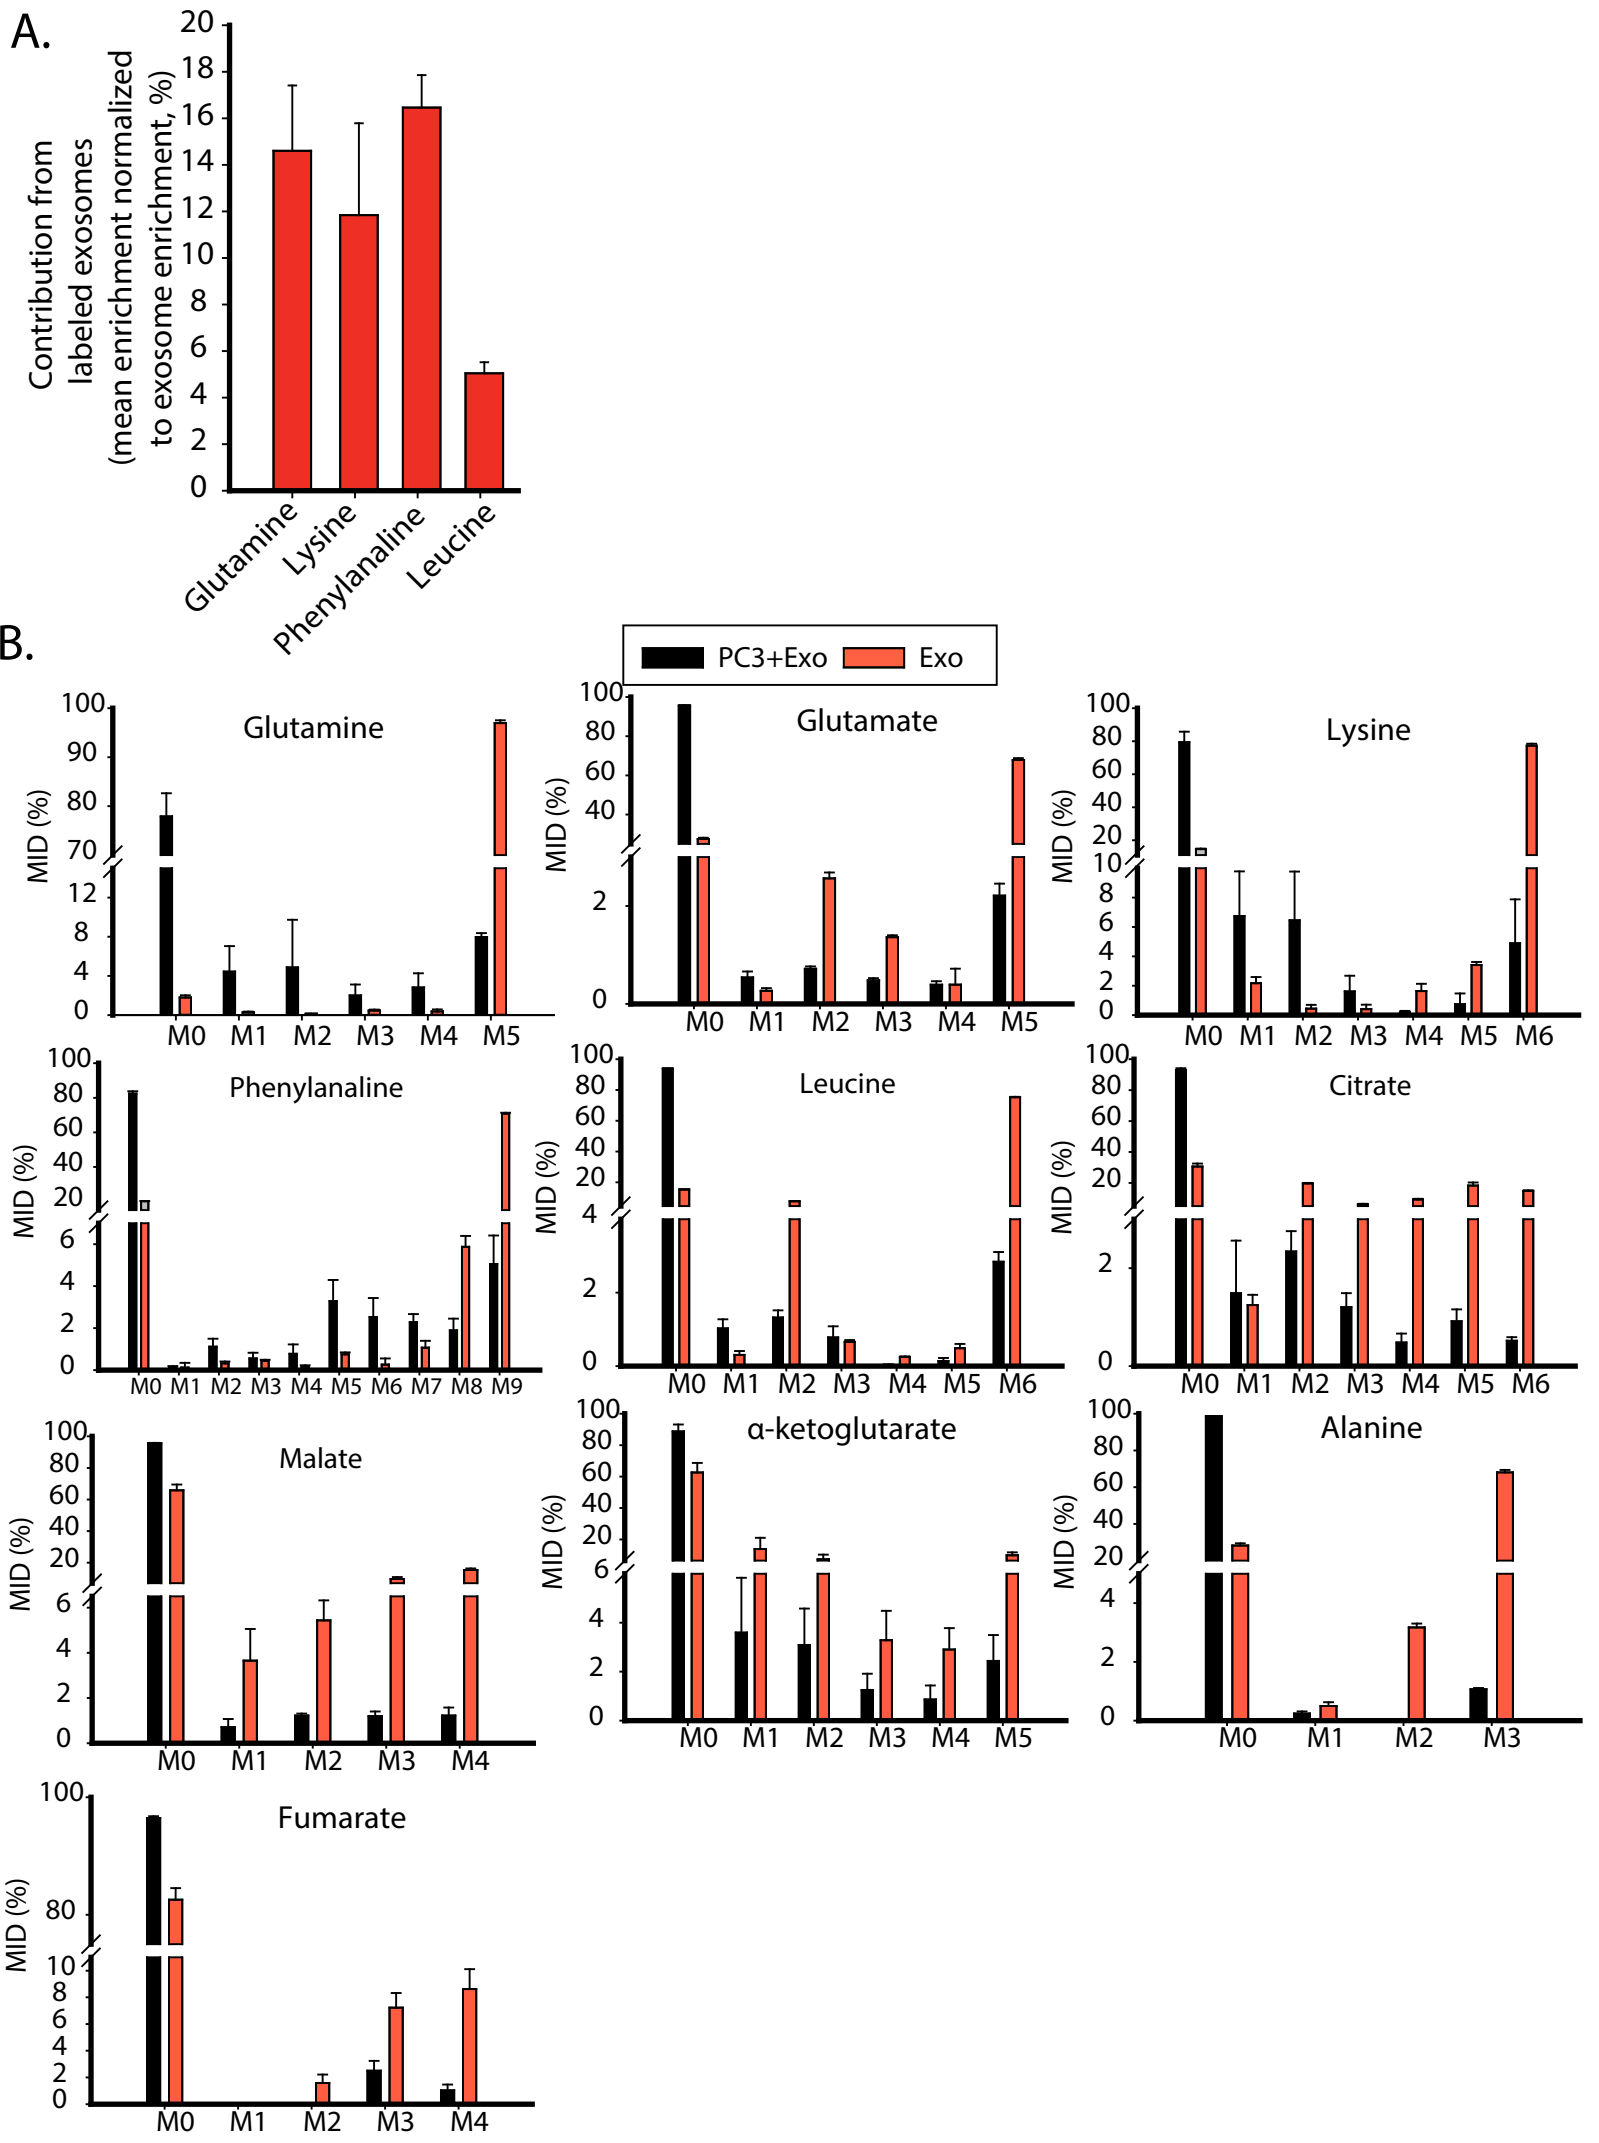

Supplement: supp [file elife-10250-supp-v1.zip]

Figure 7-figure supplement 4

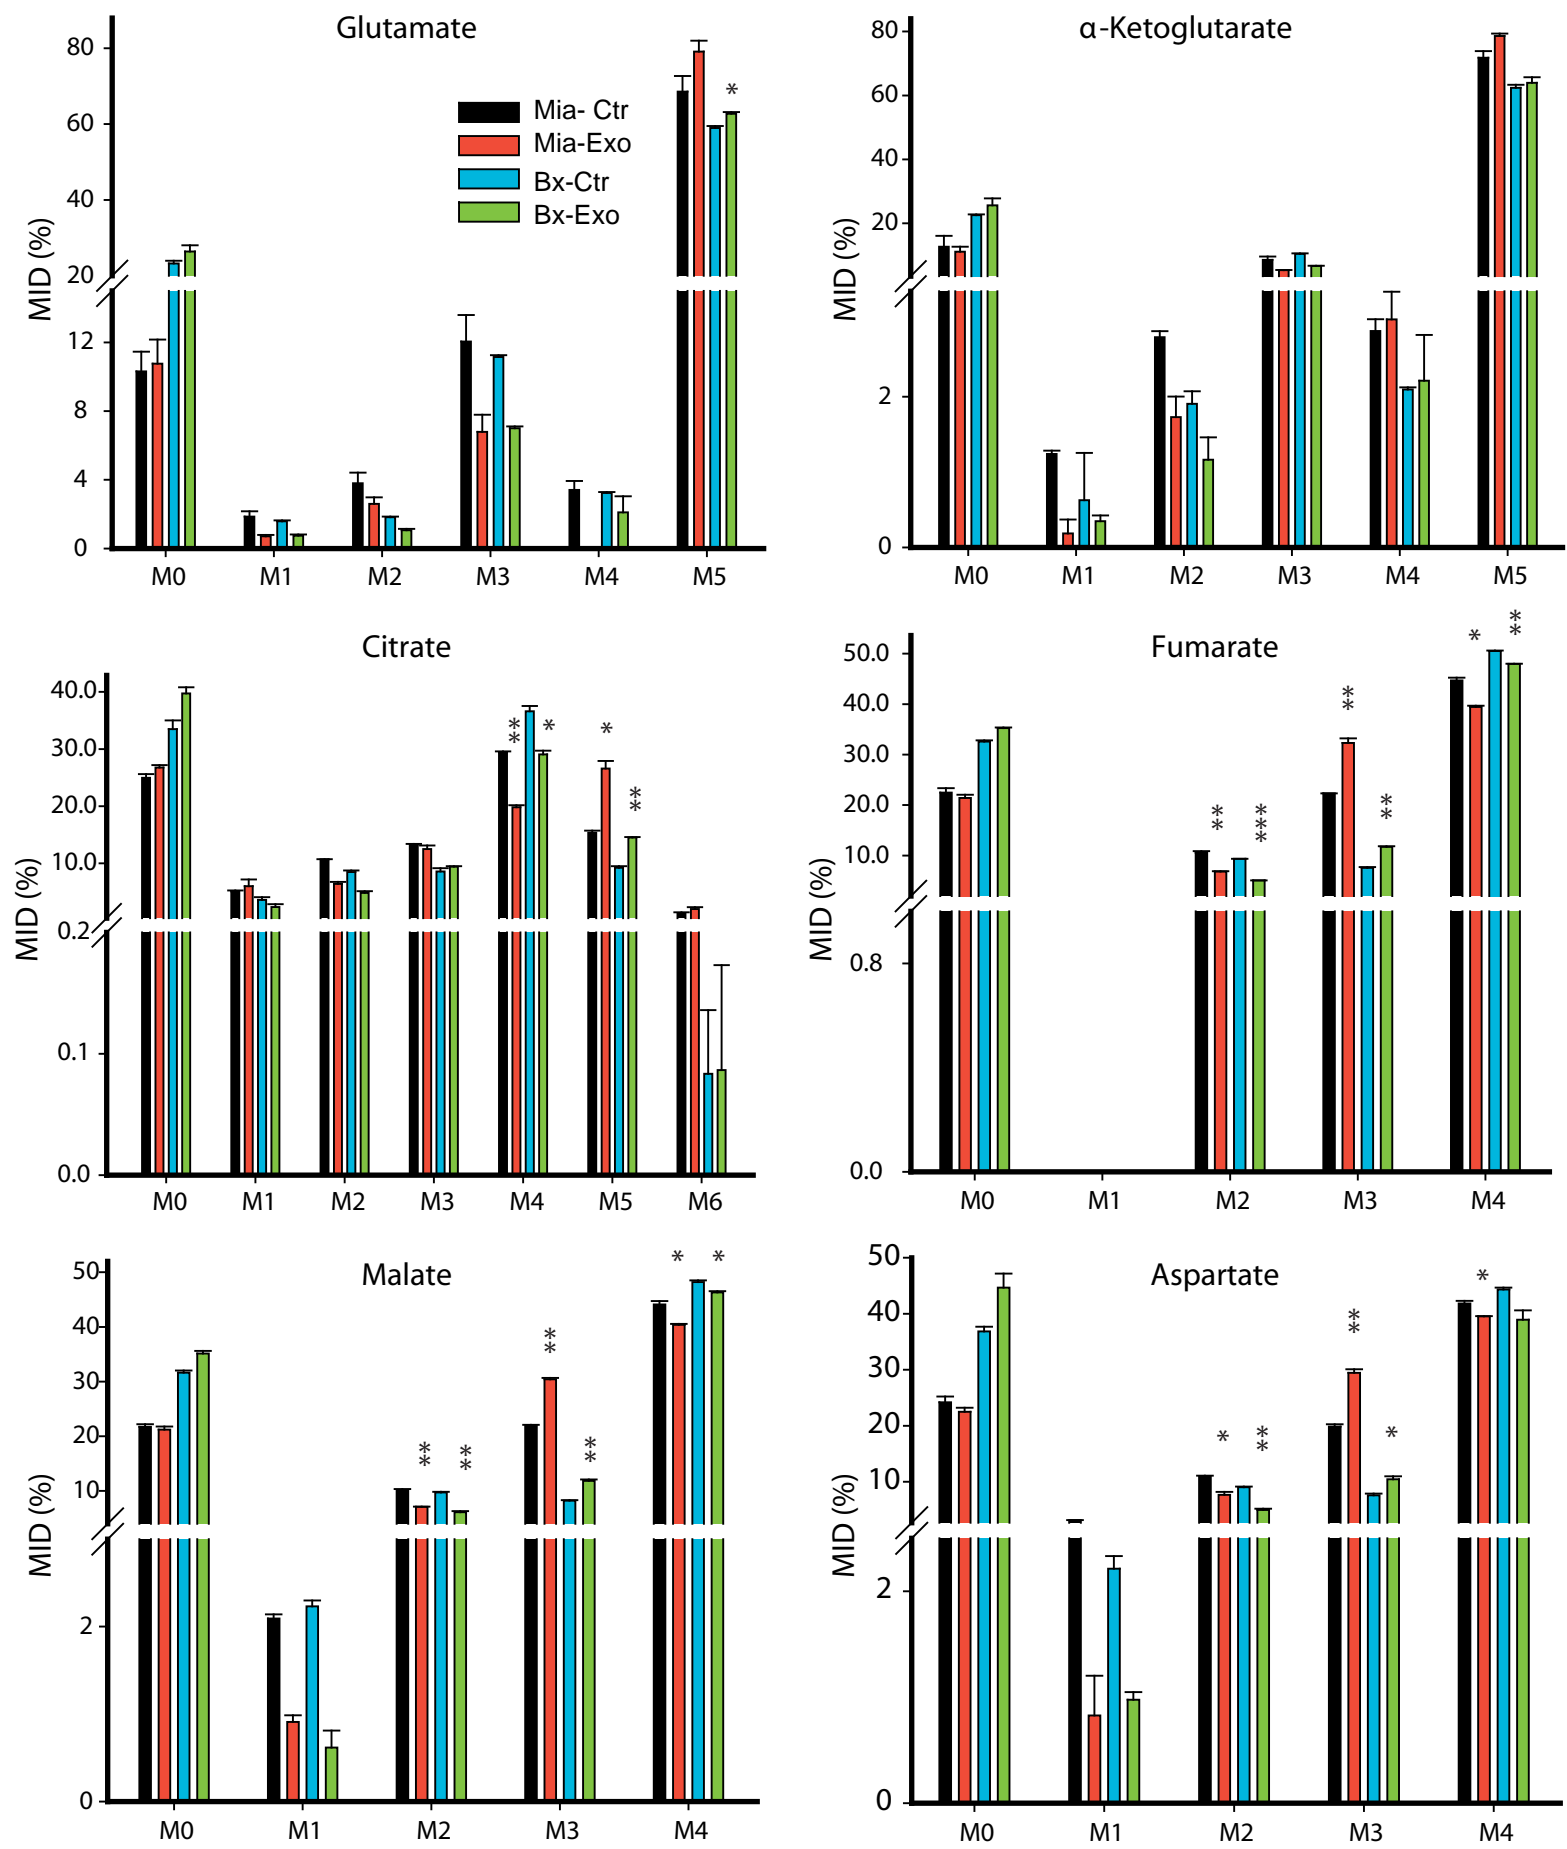

Supplement: supp [file elife-10250-supp-v1.zip]

Figure 3- figure supplement 1

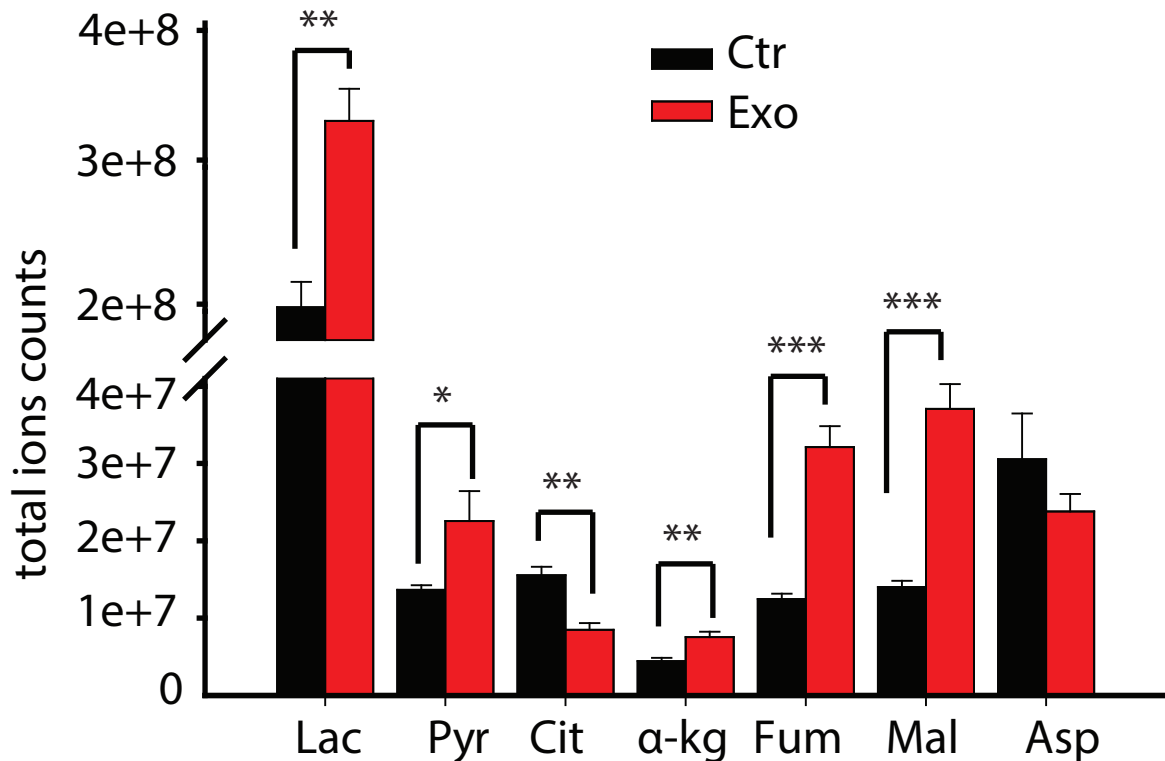

Supplement: supp [file elife-10250-supp-v1.zip]

Figure 7-figure supplement 2.

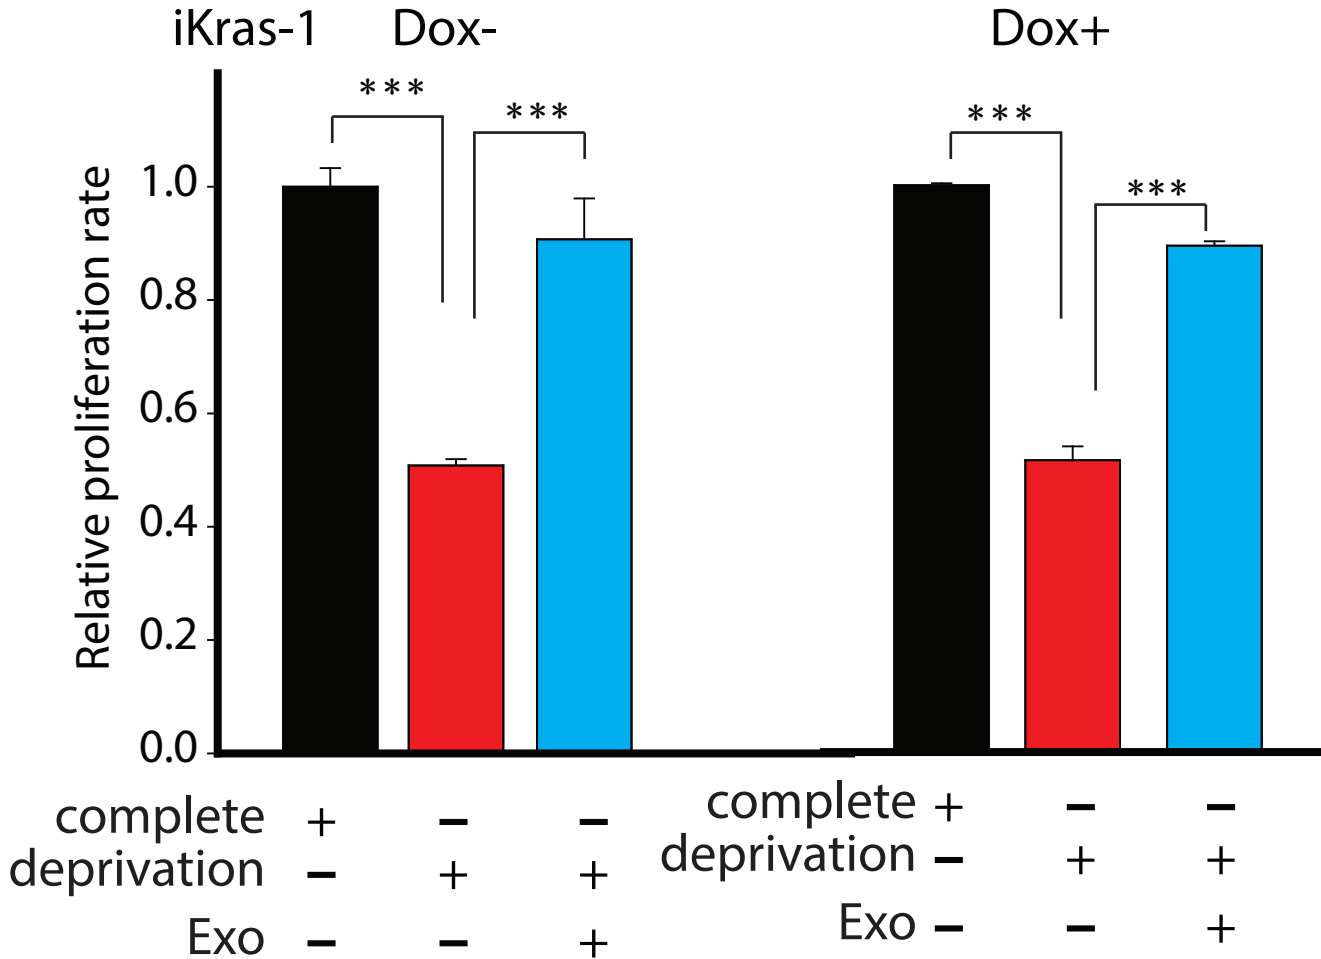

Supplement: supp [file elife-10250-supp-v1.zip]

Figure 7-figure supplement 1

BxPC3

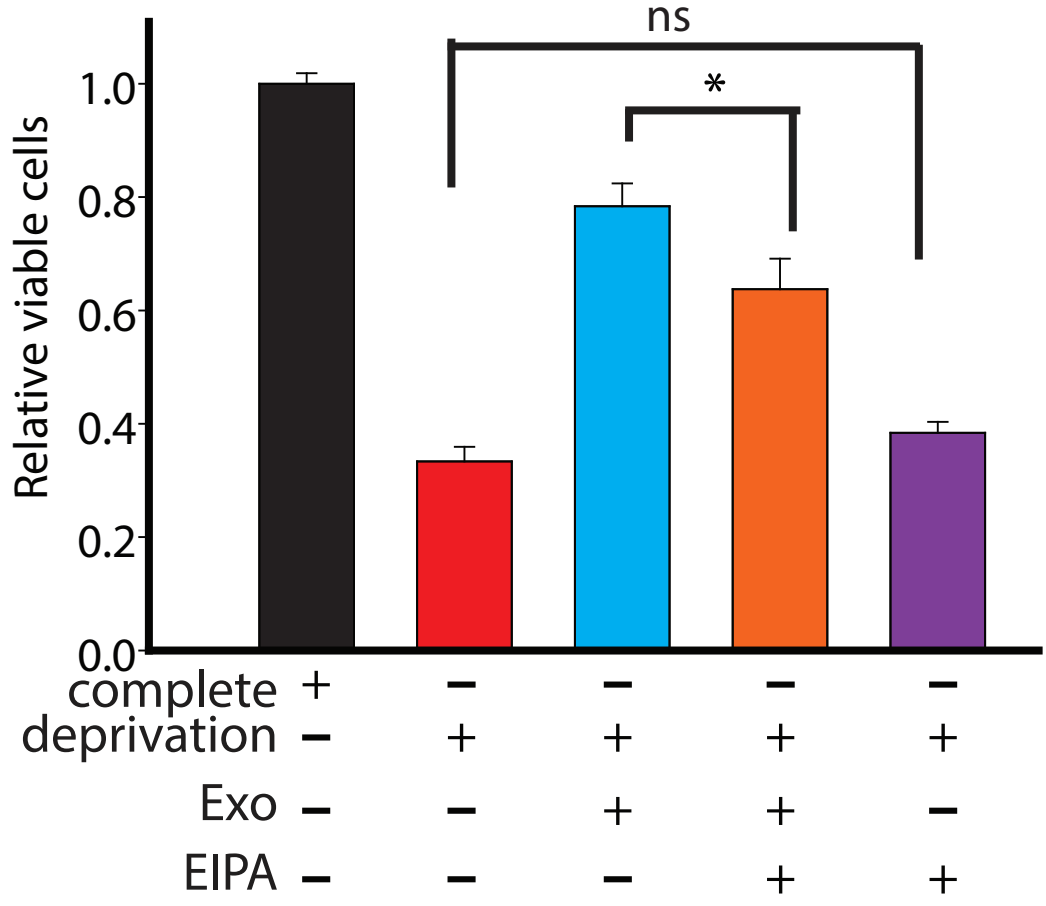

MiaPaCa-2

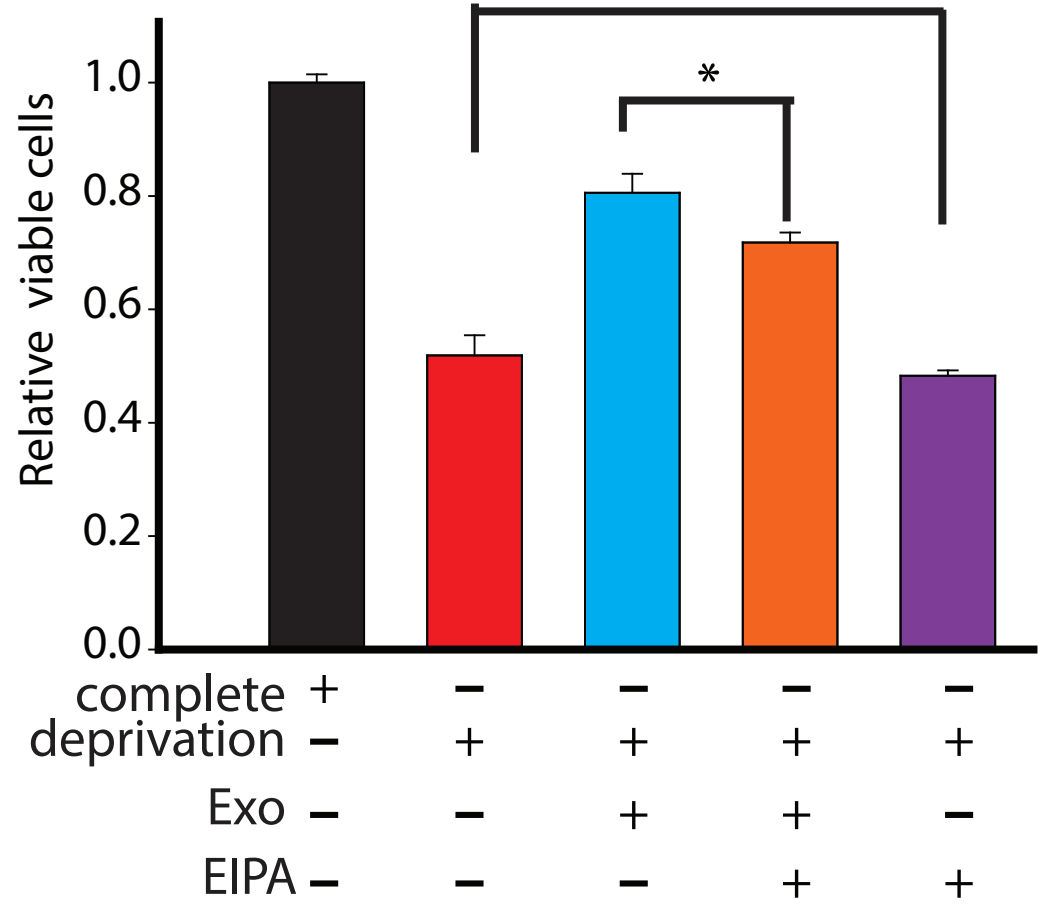

BxPC3

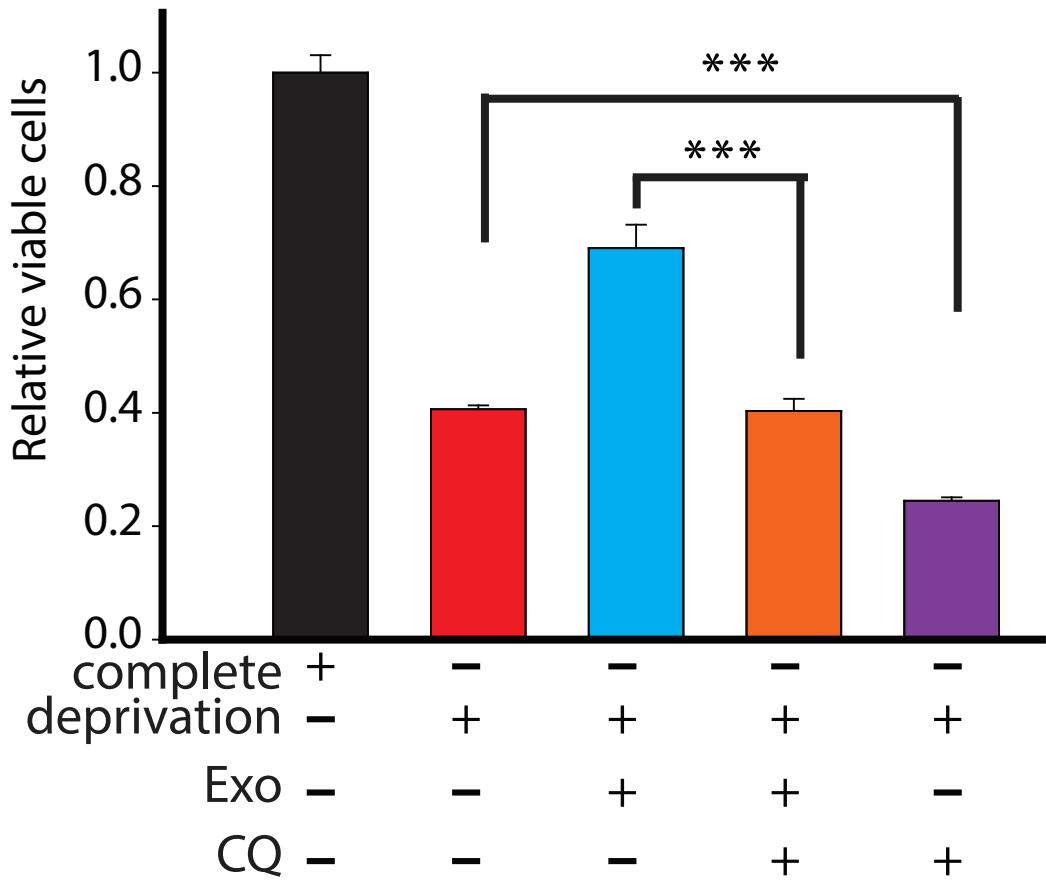

MiaPaCa-2

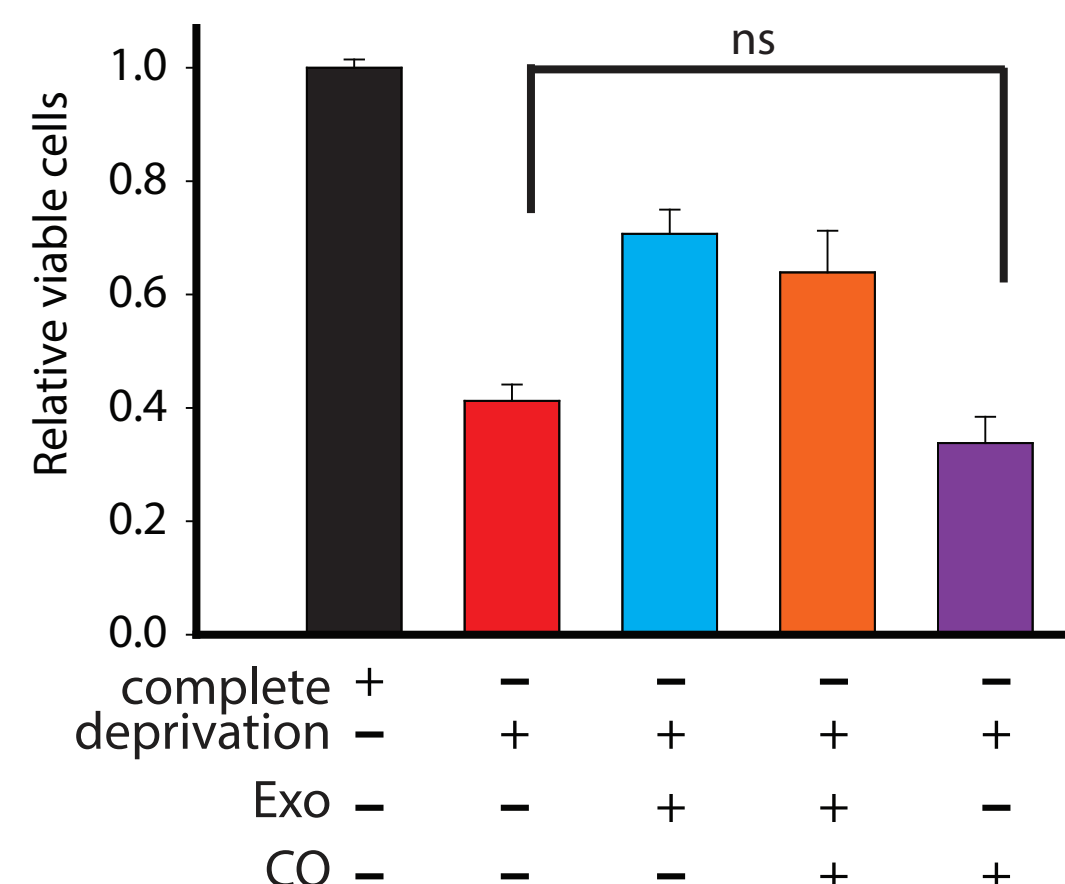

BxPC3

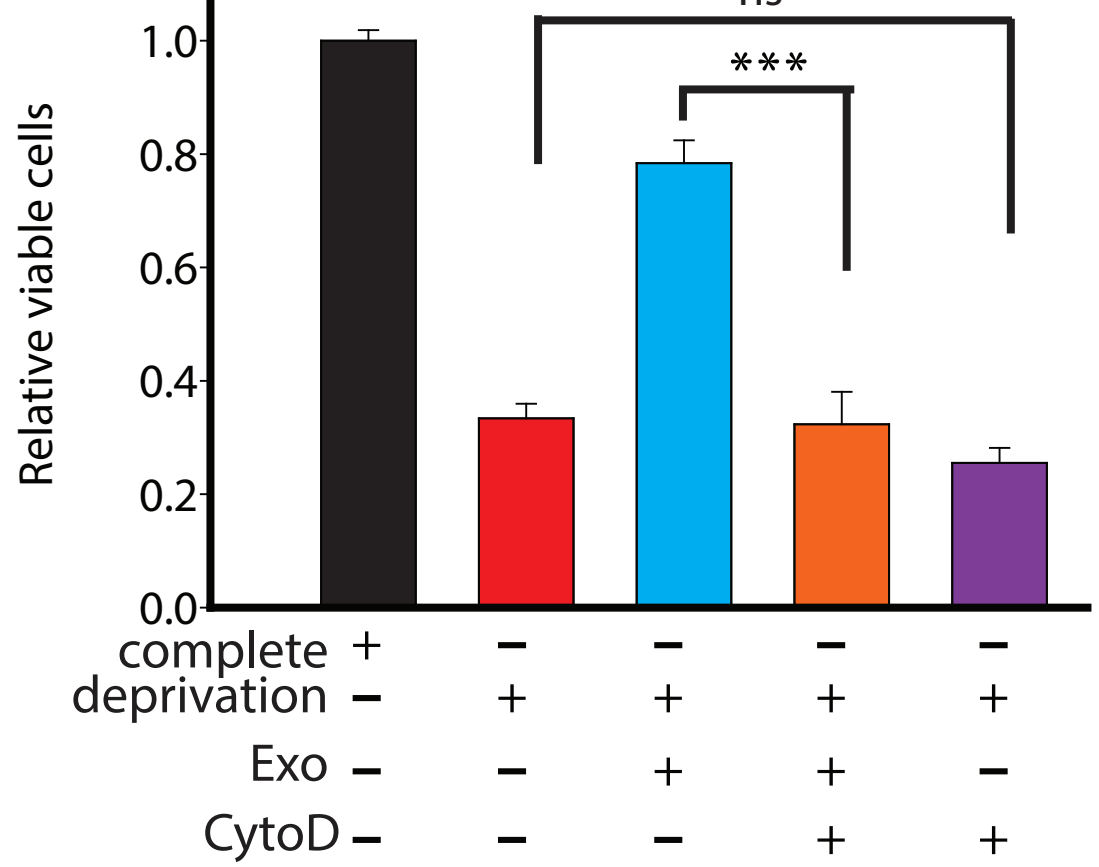

MiaPaCa-2

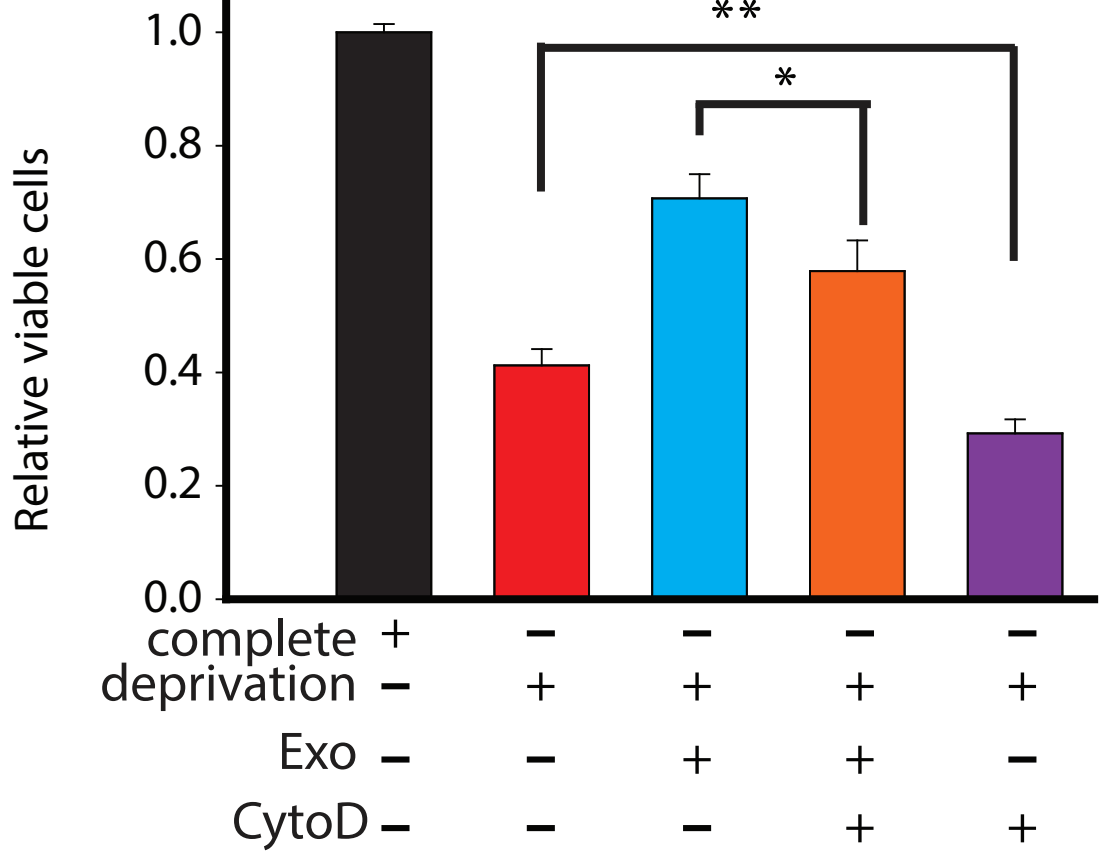

Supplement: supp [file elife-10250-supp-v1.zip]

Figure 2- figure supplement 1.

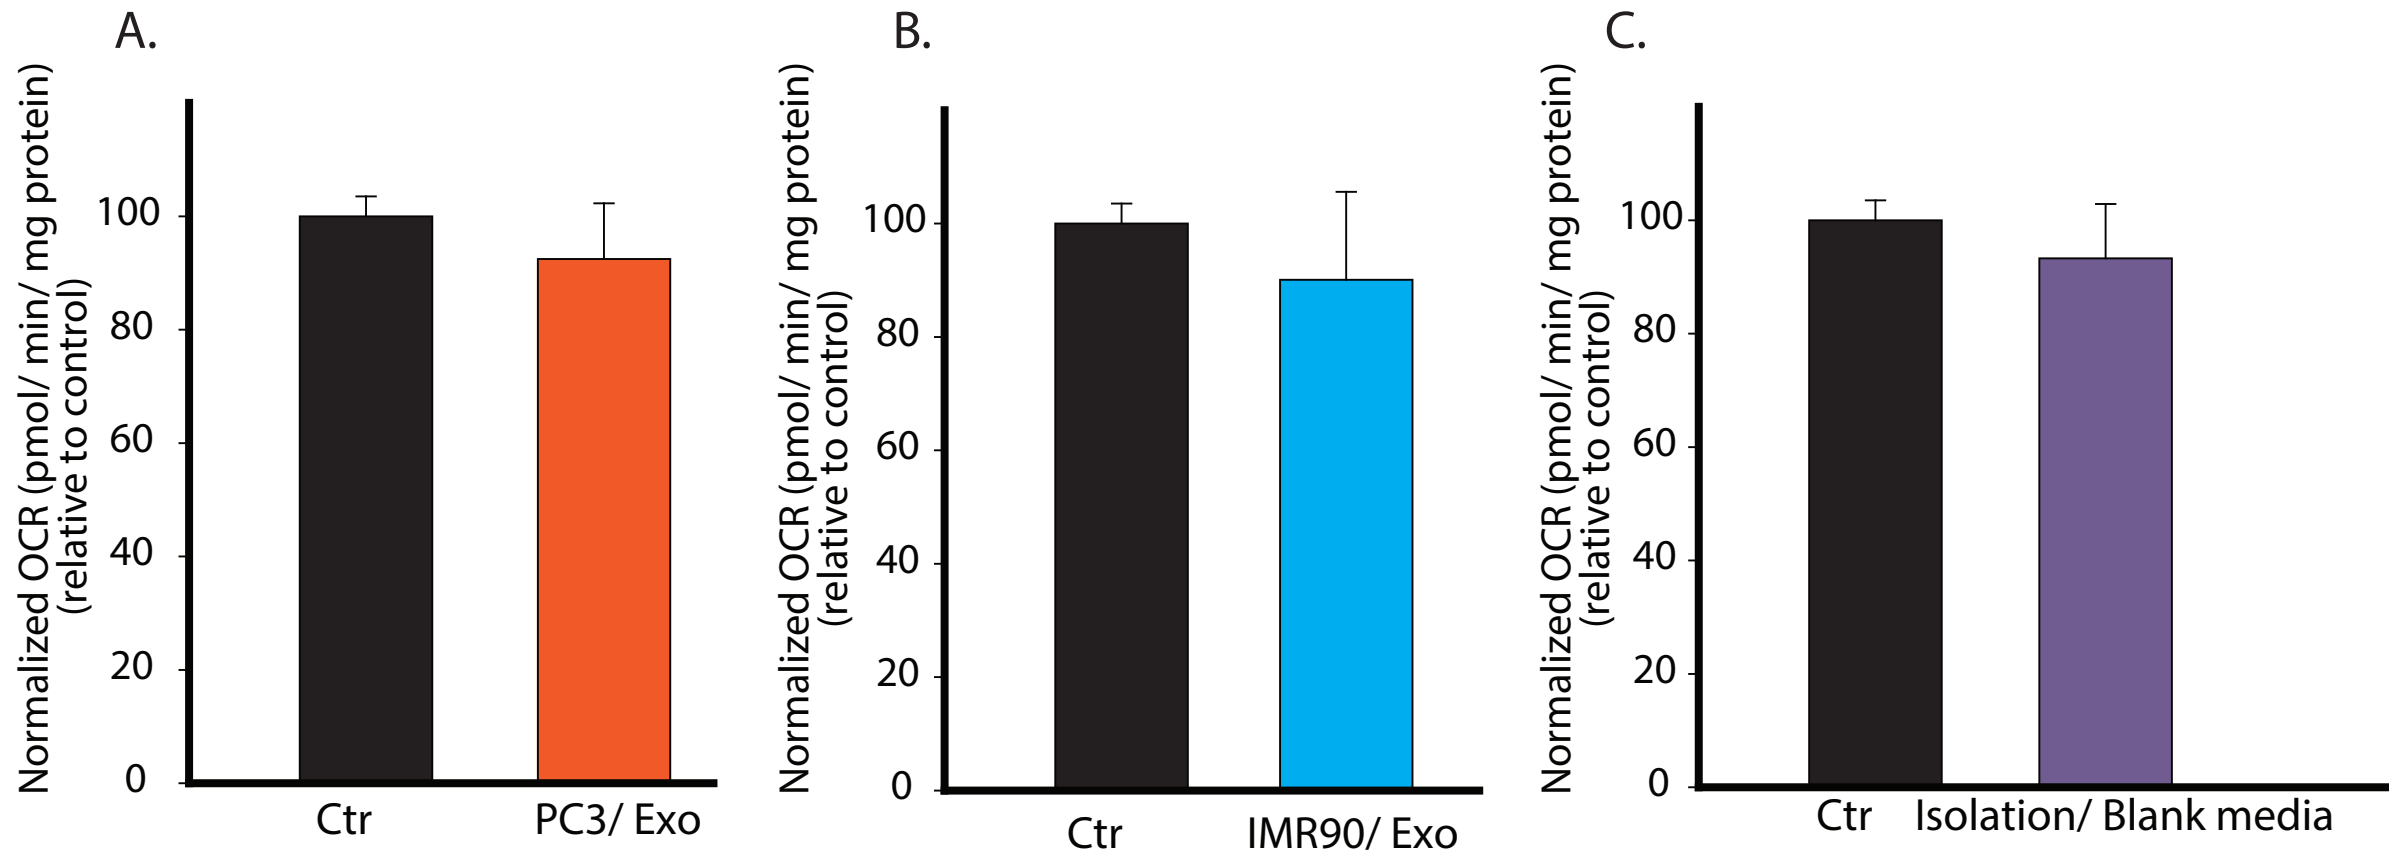

Supplement: supp [file elife-10250-supp-v1.zip]

Figure 4- figure supplement 1.

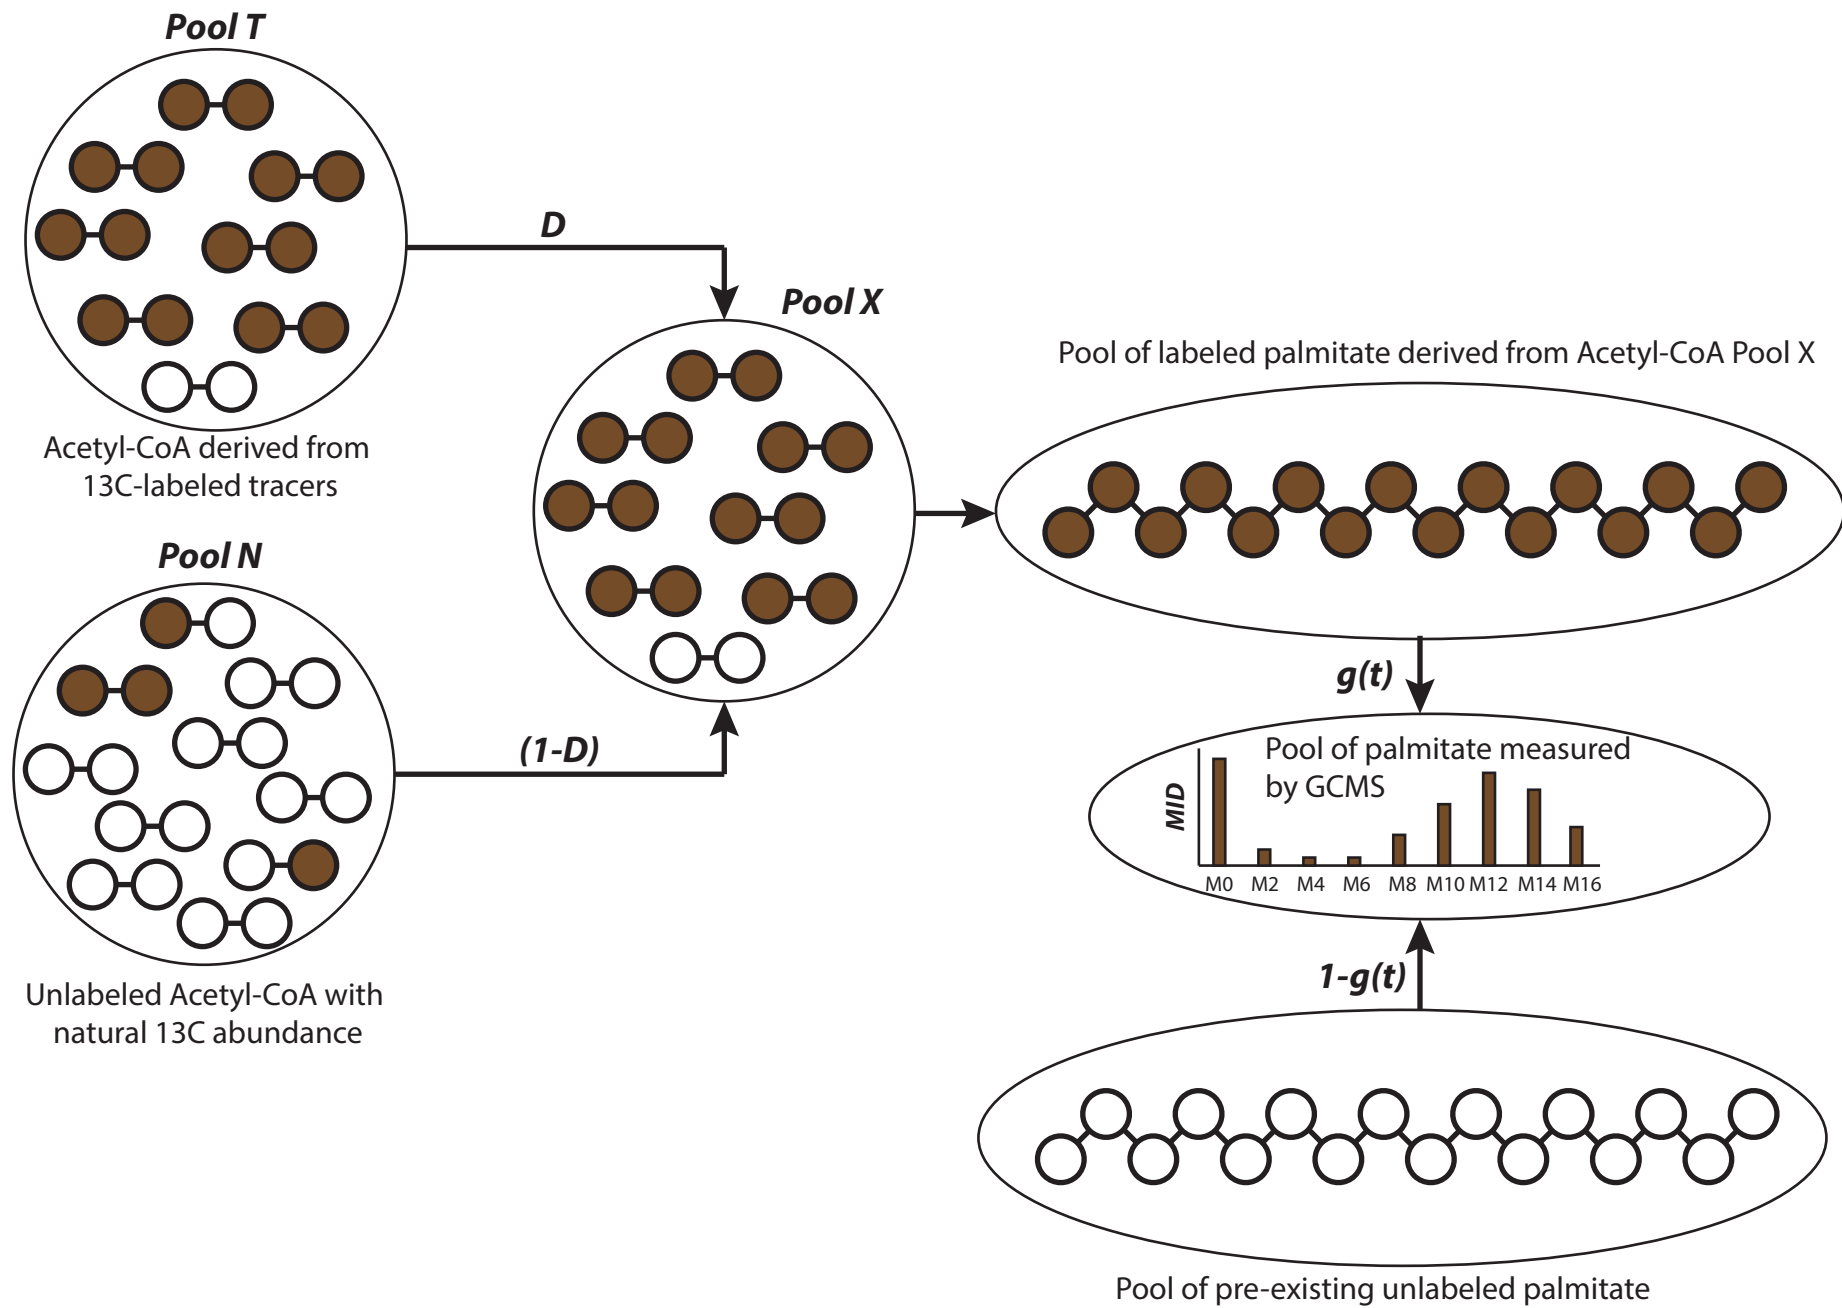

Supplement: supp [file elife-10250-supp-v1.zip]

Figure 7-figure supplement 3

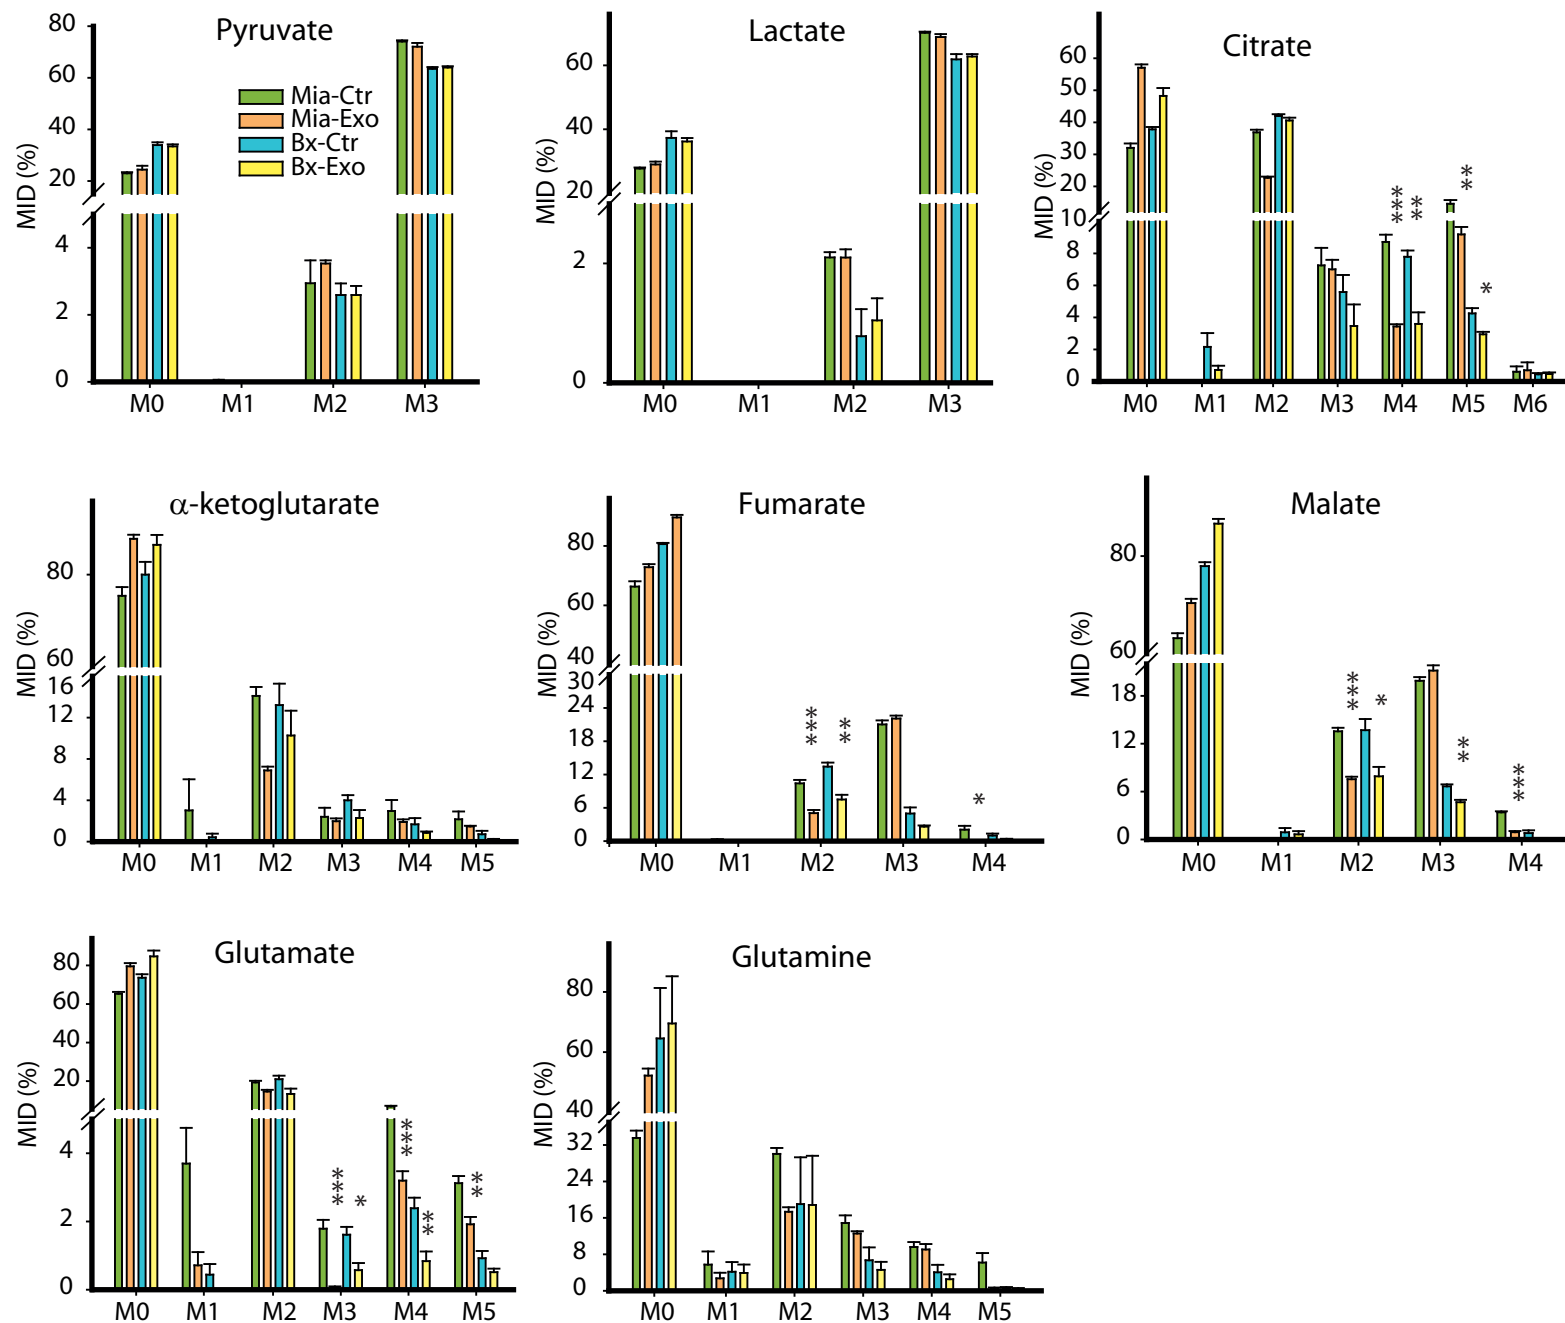

Supplement: supp [file elife-10250-supp-v1.zip]
